# Supplementary material for: A Large Retrospective Assessment of Voriconazole Exposure in Patients Treated with Extracorporeal Membrane Oxygenation
Source: MDPI journal article supplement (doi:10.3390/microorganisms9071543), 2021-07-20
Supplement: s1 [file s1]

## Supplementary data

**Table S1.** Baseline characteristics

| Patient characteristics ( <i>n</i> =69 patients)                |            |
|-----------------------------------------------------------------|------------|
| <i>Demographics</i>                                             |            |
| Sex, male, <i>n</i> (%)                                         | 46 (67)    |
| Age, median (IQR), <i>years</i>                                 | 54 (42–60) |
| Body weight, median (IQR), <i>kg</i>                            | 77 (65–95) |
| <i>Clinical characteristics</i>                                 |            |
| Length of ICU stay at study site, median (IQR), <i>days</i> *   | 40 (26–57) |
| Deceased during ICU stay, <i>n</i> (%)                          | 33 (48)    |
| APACHE II score on ICU admission, median (IQR), ( <i>n</i> =58) | 18 (14–23) |
| <i>Reason for admission</i>                                     |            |
| Pneumonia, <i>n</i> (%)                                         | 26 (37.7)  |
| Transplantation, <i>n</i> (%)                                   | 8 (11.6)   |
| HSCT, <i>n</i> (%)                                              | 1 (1.5)    |
| SOT, <i>n</i> (%)                                               | 7 (10.1)   |
| Cystic fibrosis, <i>n</i> (%)                                   | 5 (7.3)    |
| Sepsis, <i>n</i> (%)                                            | 5 (7.3)    |
| Dermatomyositis, <i>n</i> (%)                                   | 5 (7.3)    |
| Interstitial Lung Disease, <i>n</i> (%)                         | 1 (1.5)    |
| ARDS, <i>n</i> (%)                                              | 2 (2.9)    |
| Other, <i>n</i> (%)                                             | 7 (10.1)   |
| Unknown, <i>n</i> (%)                                           | 10 (14.5)  |

*n*: number of patients; IQR: interquartile range; ICU: intensive care unit; HSCT: Hematopoietic stem-cell transplantation; SOT: solid organ transplantation; ARDS: acute respiratory distress syndrome; APACHE: Acute Physiology and Chronic Health Evaluation

\*The ICU stay is defined as the length of stay in the ICU of the participating center. Any stay at ICU, in the period before or after, in another non-participating center, is not mentioned.

**Table S2.** Distribution of number of  $C_{\min}$  among different hospitals

| $C_{\min}$ ( $n=337$ ) | Total | With ECMO | Without ECMO |
|------------------------|-------|-----------|--------------|
| Hospital 1             | 2     | 2         | 0            |
| Hospital 2             | 4     | 4         | 0            |
| Hospital 3             | 36    | 34        | 2            |
| Hospital 4             | 37    | 28        | 9            |
| Hospital 5             | 19    | 14        | 5            |
| Hospital 6             | 28    | 25        | 3            |
| Hospital 7             | 209   | 81        | 128          |
| Hospital 8             | 2     | 2         | 0            |

$C_{\min}$ : voriconazole trough concentrations; ECMO: extracorporeal membrane oxygenation

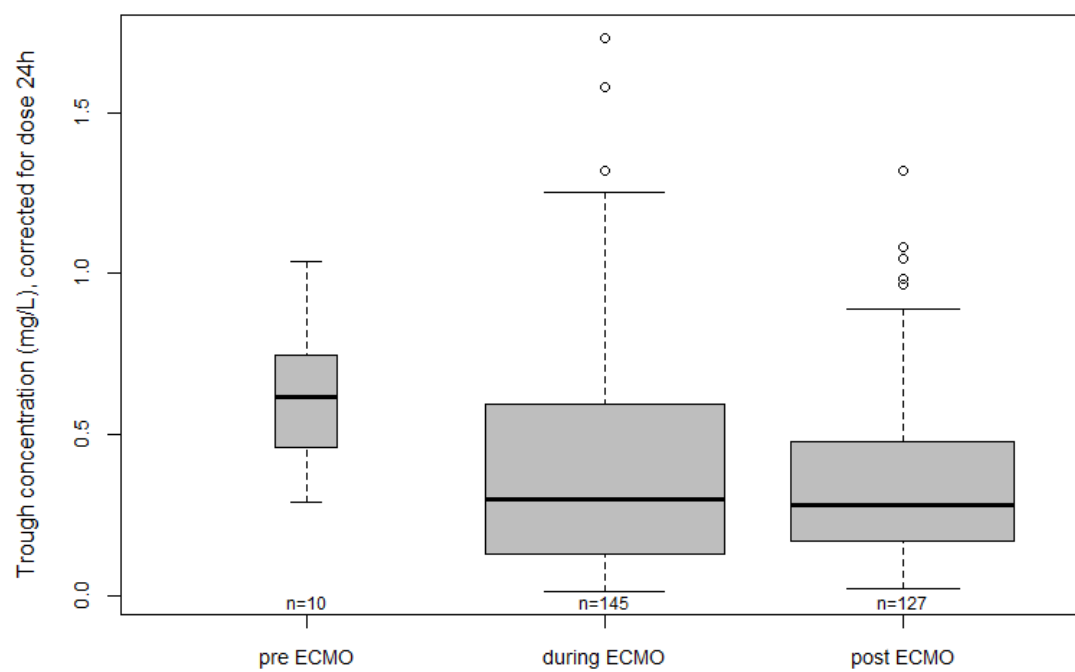**Figure S1.** Voriconazole trough concentrations for three different timeframes (pre, during and post ECMO).

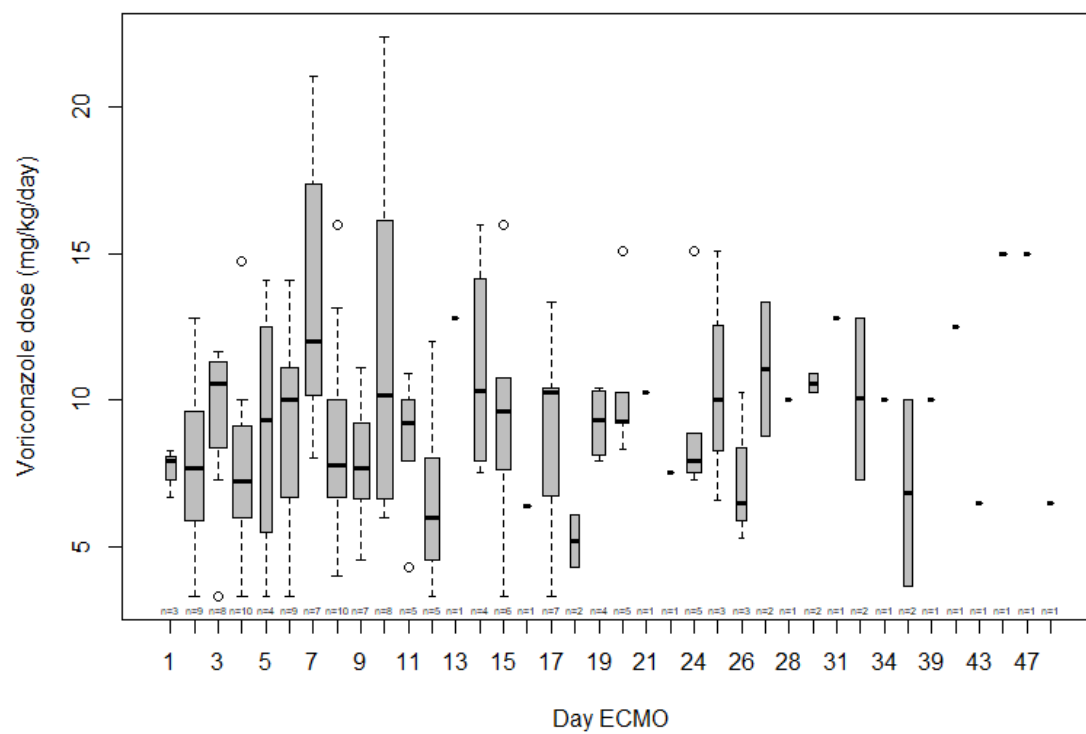

**Figure S2.** Voriconazole dose in function of day of ECMO.
